# Supplementary material for: Induction of Stress-Induced Renal Cellular Senescence In Vitro: Impact of Mouse Strain Genetic Diversity
Source: MDPI journal article supplement (doi:10.3390/cells10061437), 2021-06-08
Supplement: s1 [file s1]

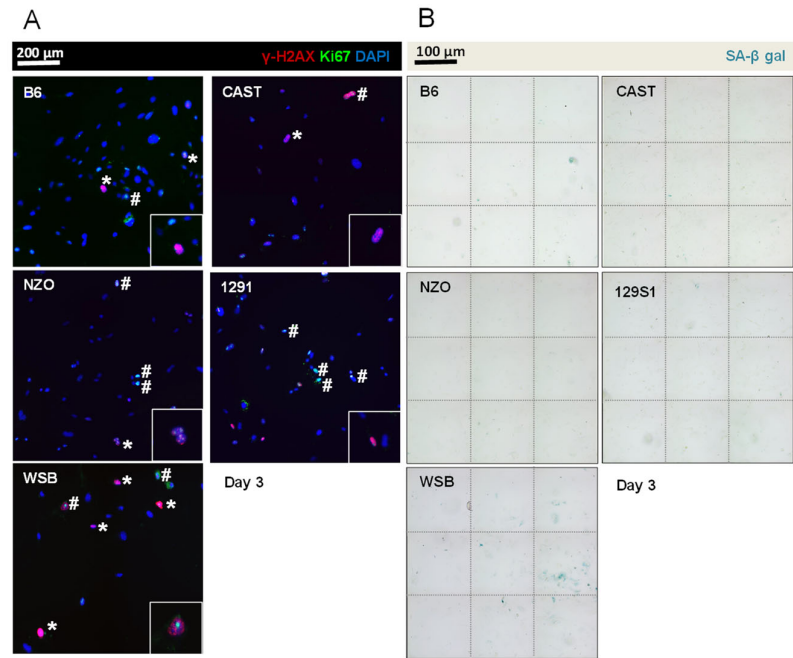

**Figure S1.** Analysis of cellular senescence at 3 days after irradiation using  $\gamma$ H2AX and Ki67 immunofluorescence co-staining and senescence-associated beta-galactosidase (SA- $\beta$ -gal). **(A)** Representative images of PTEC at day 3 after irradiation showing immunofluorescent staining for  $\gamma$ H2AX and Ki67. Cells were counted as senescent (marked with \*) when Ki67-negative and simultaneously positive for over five  $\gamma$ H2AX foci. Ki67-positive cells are marked with #. Original magnification 400 $\times$ . **(B)** Representative images of PTEC after SA- $\beta$ -gal staining (positive cells are blue). Original magnification 200 $\times$ .
